# Supplementary material for: Theoretical investigations of a new two-dimensional semiconducting boron–carbon–nitrogen structure
Source: Royal Society of Chemistry journal article supplement (doi:10.1039/c9ra09723f), 2020-01-01
Supplement: c9ra09723f1.pdf [file c9ra09723f1.pdf]

## Supplementary Information

### Theoretical investigations of a new two-dimensional semiconducting boron-carbon-nitrogen structure

Yihua Lu,<sup>a</sup> Xi Zhu\*<sup>a</sup> and Min Wang\*<sup>b</sup>

<sup>a</sup>Shenzhen Institute of Artificial Intelligence and Robotics for Society (AIRS), 14-15F, Tower G2, Xinghe World, Rd Yabao, Longgang District, Shenzhen, Guangdong 518172, China. E-mail: zhuxi@cuhk.edu.cn

<sup>b</sup>Chongqing Key Laboratory for Advanced Materials and Technologies of Clean Energies, School of Materials and Energy, Southwest University, Chongqing 400715, China. E-mail: minwang@swu.edu.cn

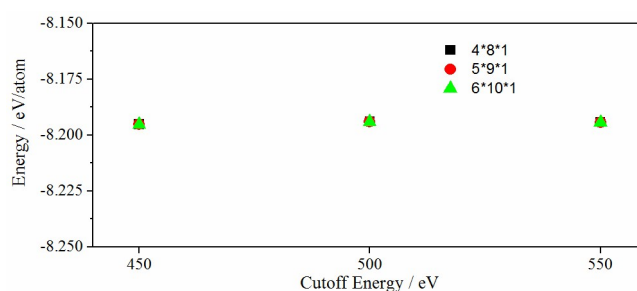

Fig. S1 Convergence test based on different cutoff energies (450, 500 and 550 eV) and k-point grids (4×8×1, 5×9×1 and 6×10×1).

Compared with two experimental synthesized BCN structures (denoted as BCN\_v1 and BCN\_v3) [*ACS Nano*, 2017, **11**, 2486-2493.], oC-B<sub>12</sub>C<sub>12</sub>N<sub>12</sub> has a higher energy, as shown in Fig. S2. The energy difference between BCN\_v3 and oC-B<sub>12</sub>C<sub>12</sub>N<sub>12</sub> is 0.4 eV/atom.

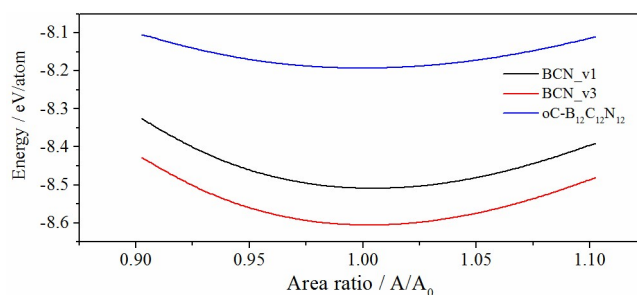

Fig. S2 Total energies of different BCN structures as a function of area ratio.
